# Supplementary material for: The discovery of half-sandwich iridium complexes containing lidocaine and (pyren-1-yl)ethynyl derivatives of phenylcyanamide ligands for photodynamic therapy
Source: Royal Society of Chemistry journal article supplement (doi:10.1039/c7dt01091e), 2017-01-01
Supplement: c7dt01091e1.pdf [file c7dt01091e1.pdf]

## Supporting Information

### **Discovery of half-sandwich Iridium complexes containing lidocaine and (Pyren-1-yl)ethynyl derivatives of phenylcyanamide ligands for photodynamic therapy**

Leila Tabrizi <sup>\*a,b</sup>

<sup>a</sup> School of Chemistry, National University of Ireland, Galway, University Road, Galway, Ireland

<sup>b</sup> Department of Chemistry, Isfahan University of Technology, Isfahan, Iran

Corresponding author: Leila Tabrizi; Email: [LEILA.TABRIZI@nuigalway.ie](mailto:LEILA.TABRIZI@nuigalway.ie)

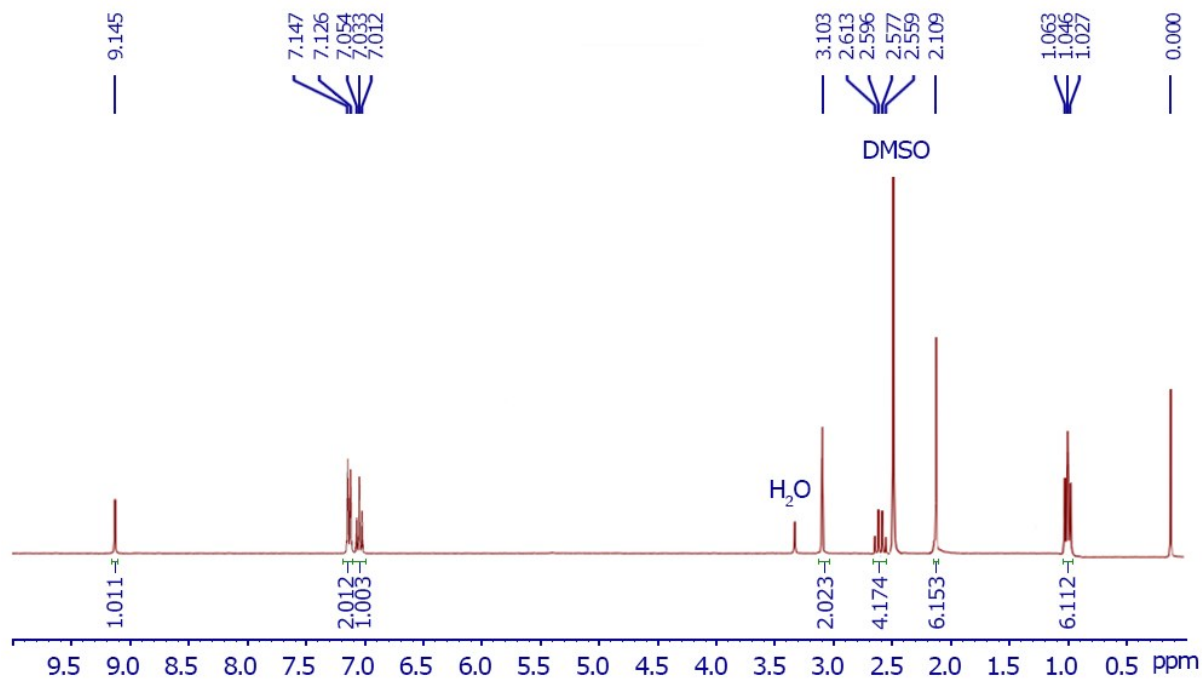

**Fig. S1.**  $^1\text{H}$  NMR spectrum of ligand LC ( $\text{DMSO-}d_6$ ).

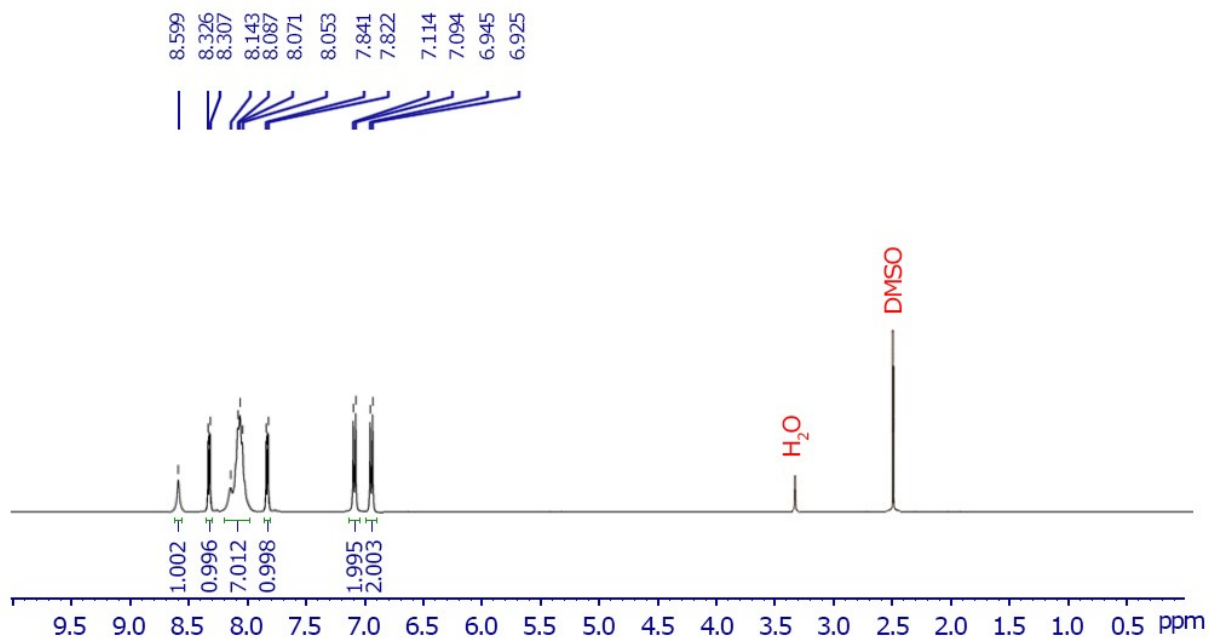

**Fig. S2.**  $^1\text{H}$  NMR spectrum of ligand L1 ( $\text{DMSO-}d_6$ ).

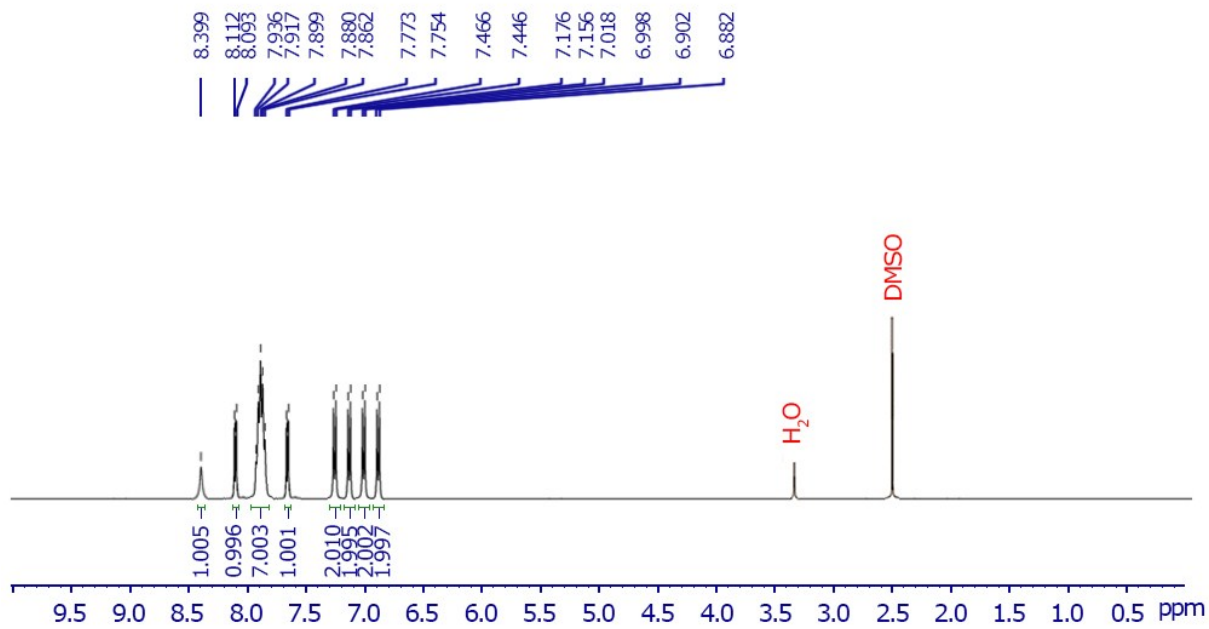

**Fig. S3.**  $^1\text{H}$  NMR spectrum of ligand L2 ( $\text{DMSO-}d_6$ ).

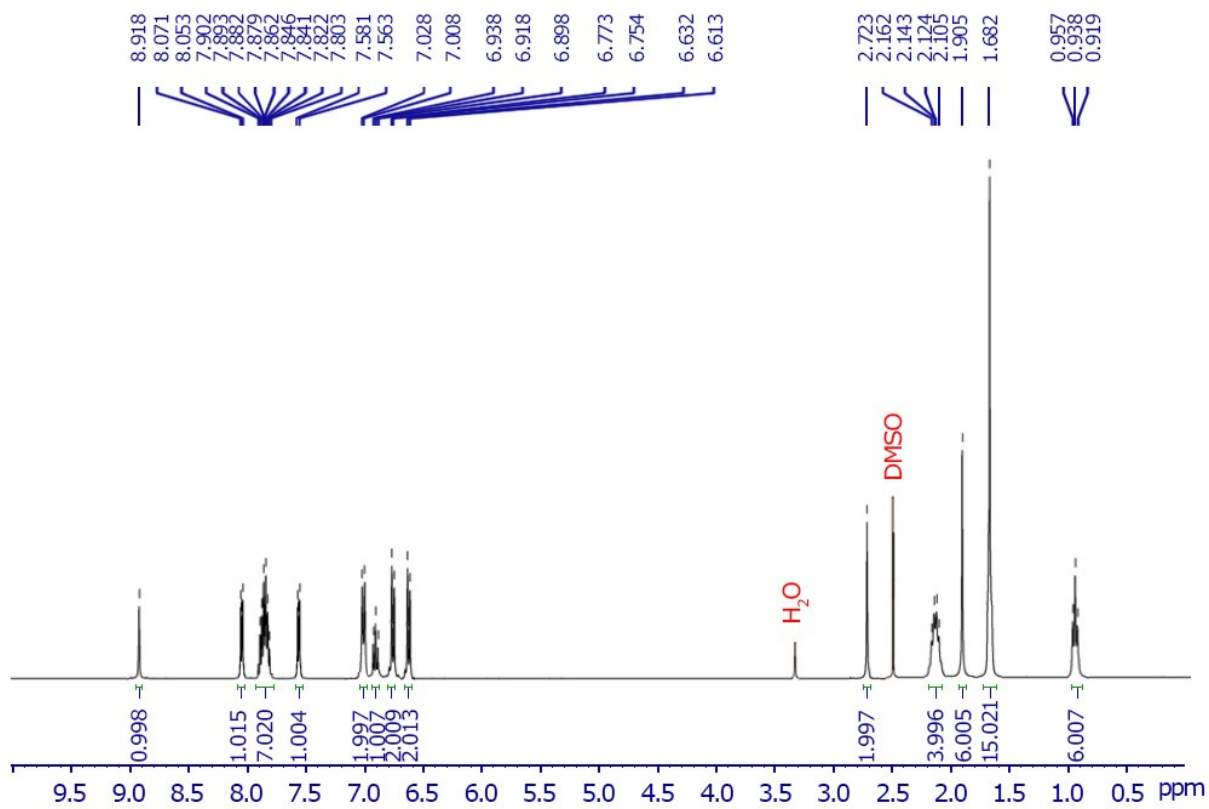

**Fig. S4.**  $^1\text{H}$  NMR spectrum of complex **1** ( $\text{DMSO-}d_6$ ).

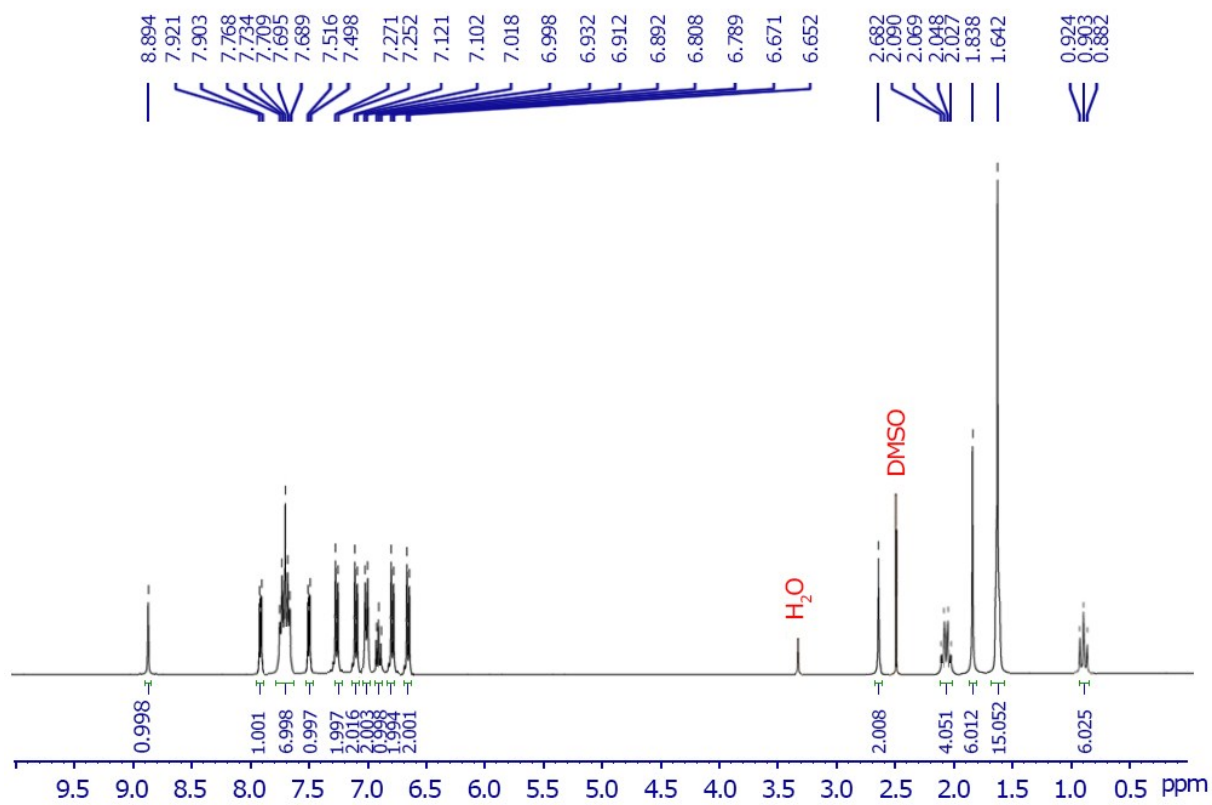

**Fig. S5.** <sup>1</sup>H NMR spectrum of complex **2** (DMSO-*d*<sub>6</sub>).

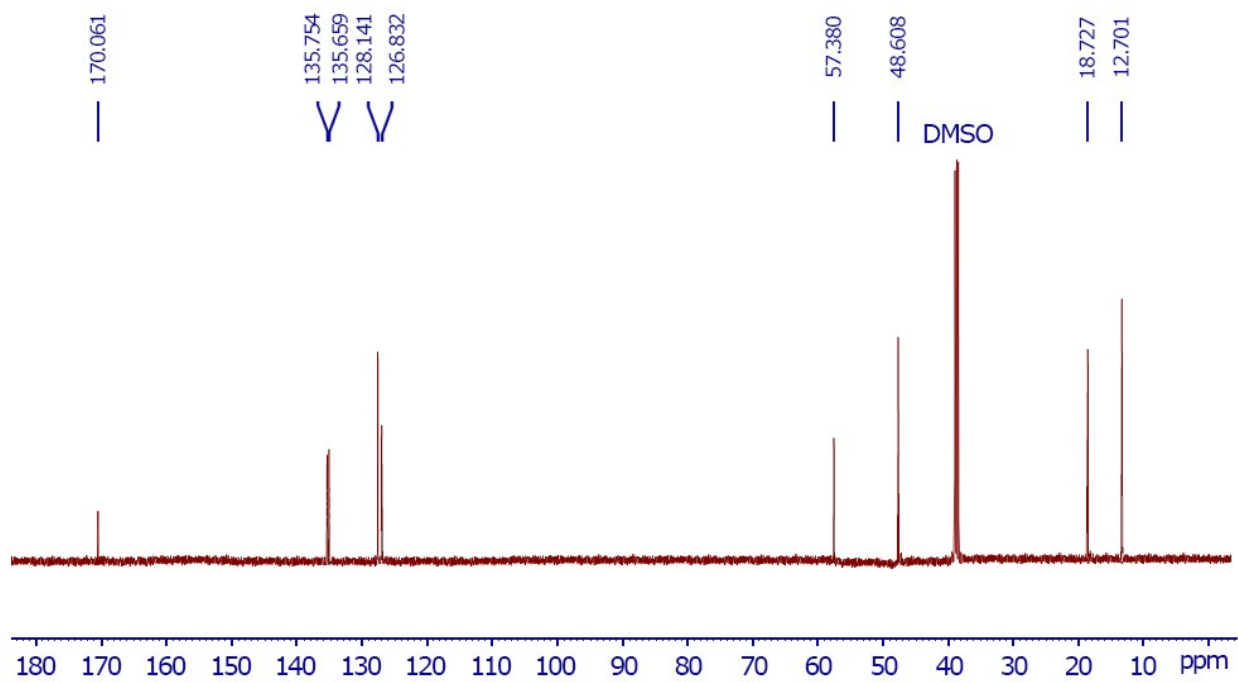

**Fig. S6.**  $^{13}\text{C}$  NMR spectrum of ligand LC ( $\text{DMSO-}d_6$ ).

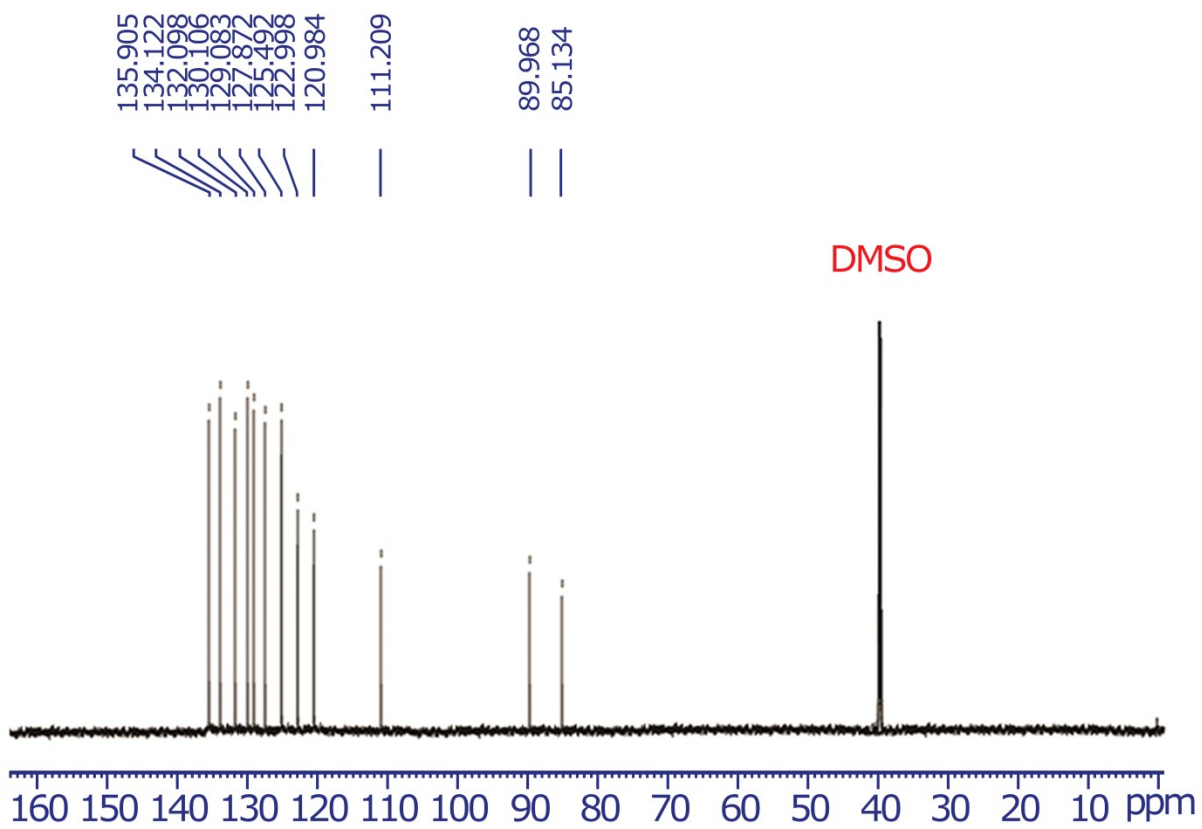

**Fig. S7.**  $^{13}\text{C}$  NMR spectrum of ligand L1 ( $\text{DMSO-}d_6$ ).



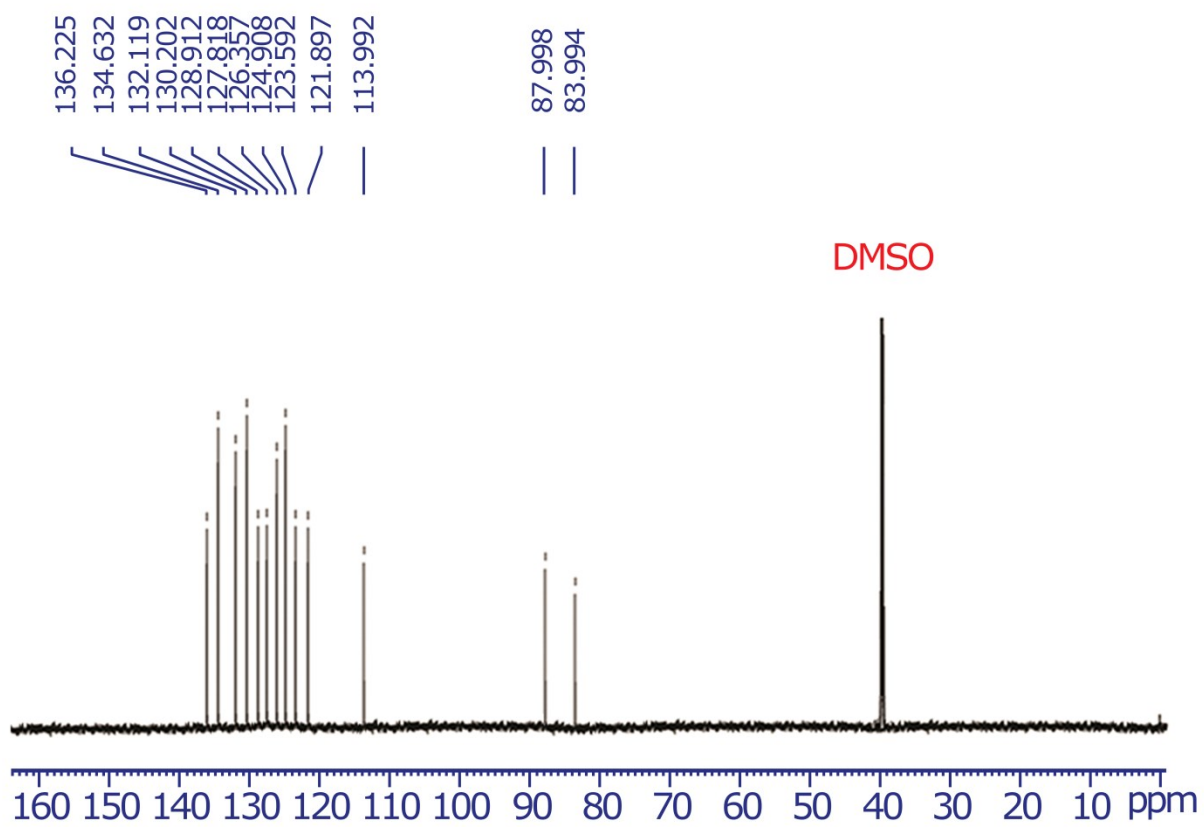

**Fig. S8.**  $^{13}\text{C}$  NMR spectrum of ligand L2 (DMSO- $d_6$ ).

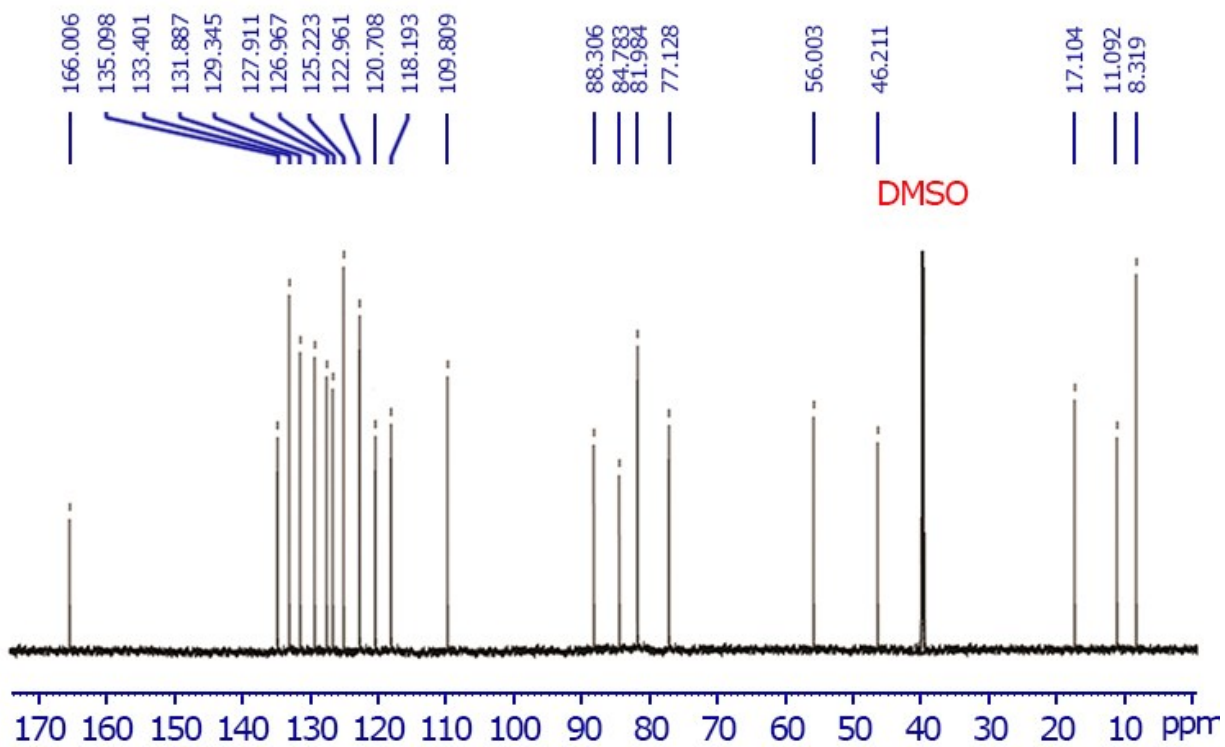

**Fig. S9.**  $^{13}\text{C}$  NMR spectrum of complex **1** ( $\text{DMSO-}d_6$ ).

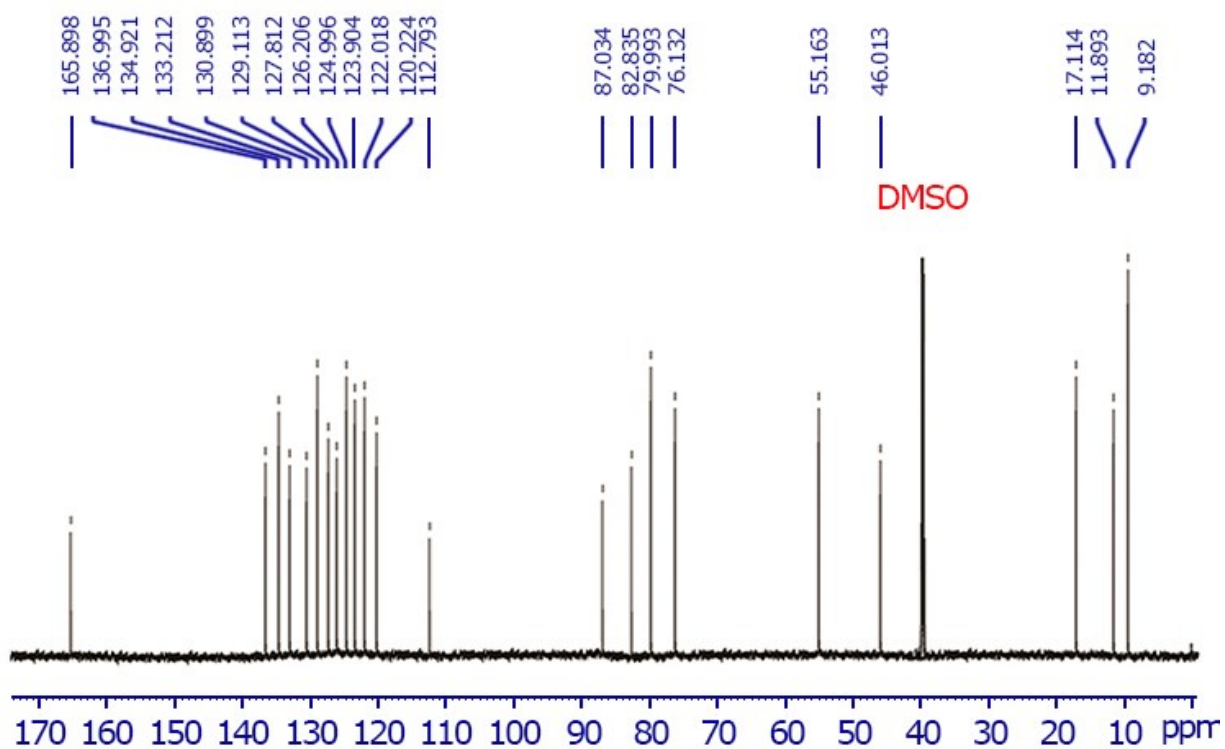

**Fig. S10.** <sup>13</sup>C NMR spectrum of complex 2 (DMSO-*d*<sub>6</sub>).

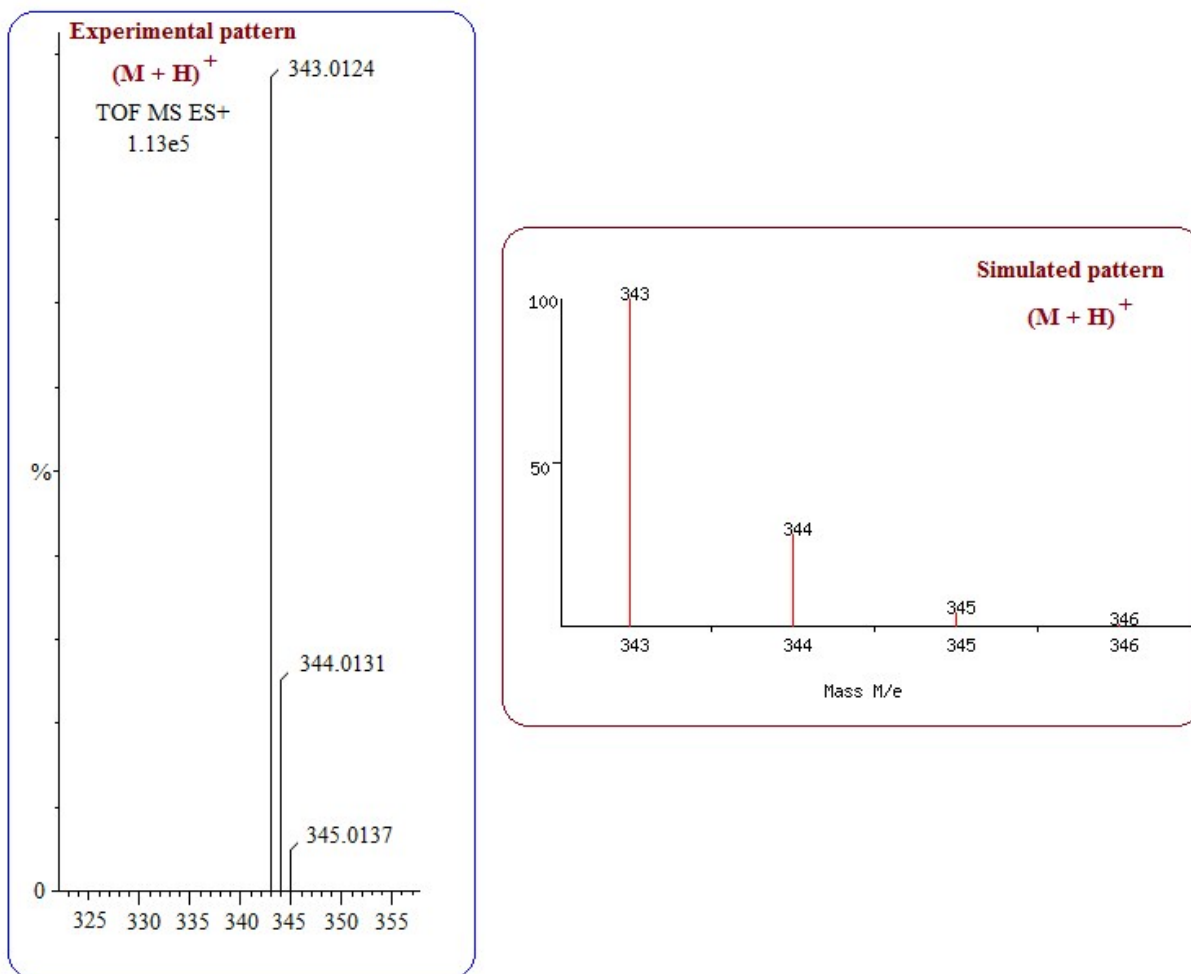

**Fig. S11.** TOF MS spectrum of ligand L1.

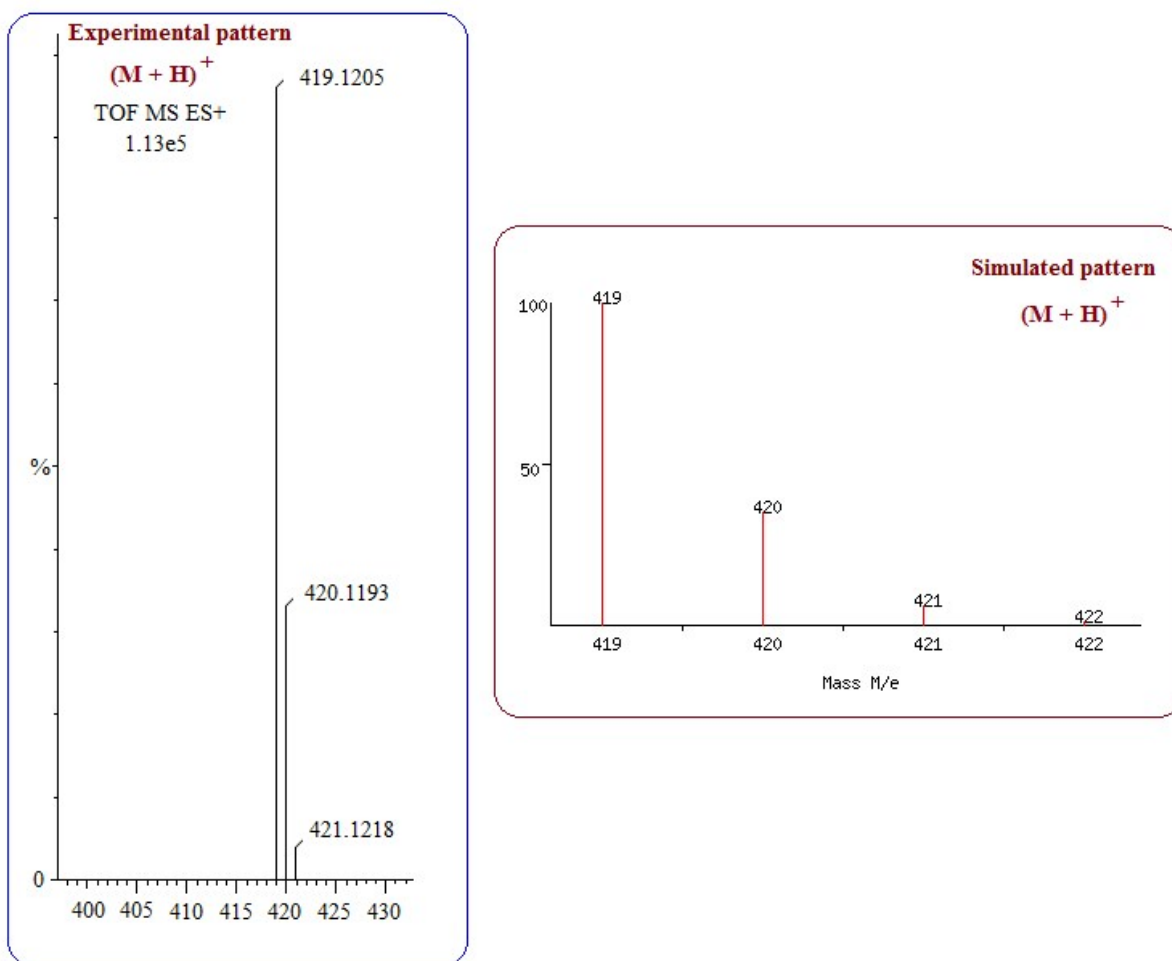

**Fig. S12.** TOF MS spectrum of ligand L2.

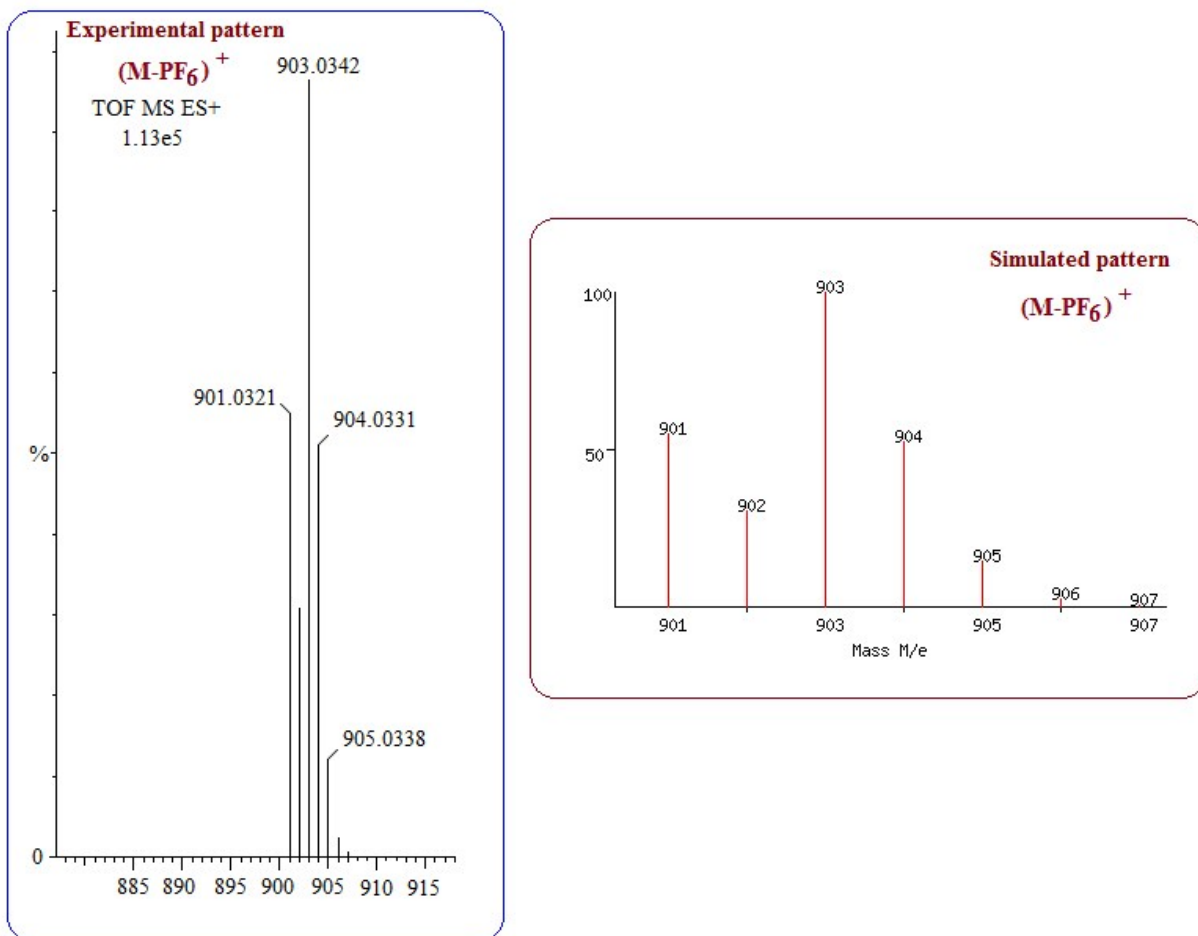

**Fig. S13.** TOF MS spectrum of complex 1.

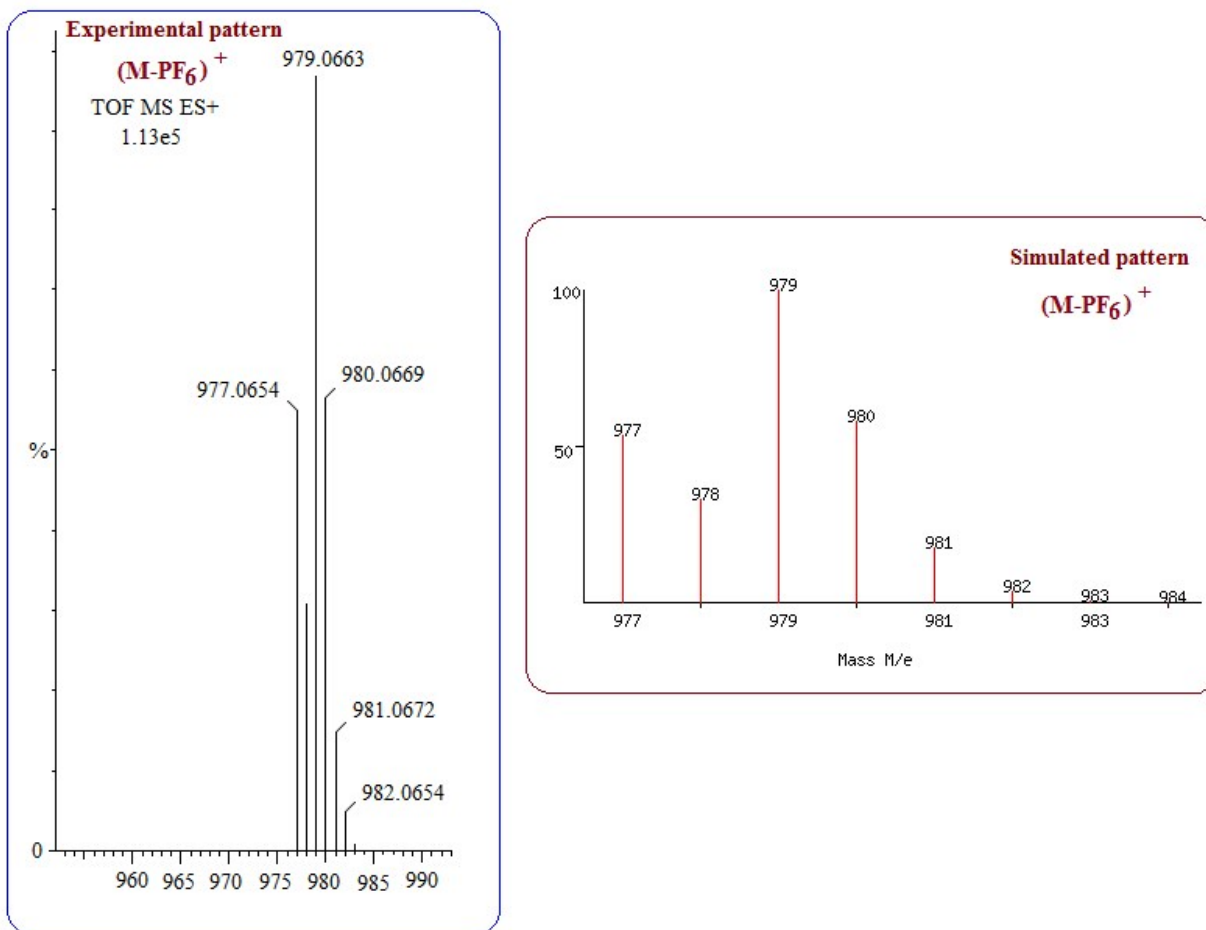

**Fig. S14.** TOF MS spectrum of complex 2.

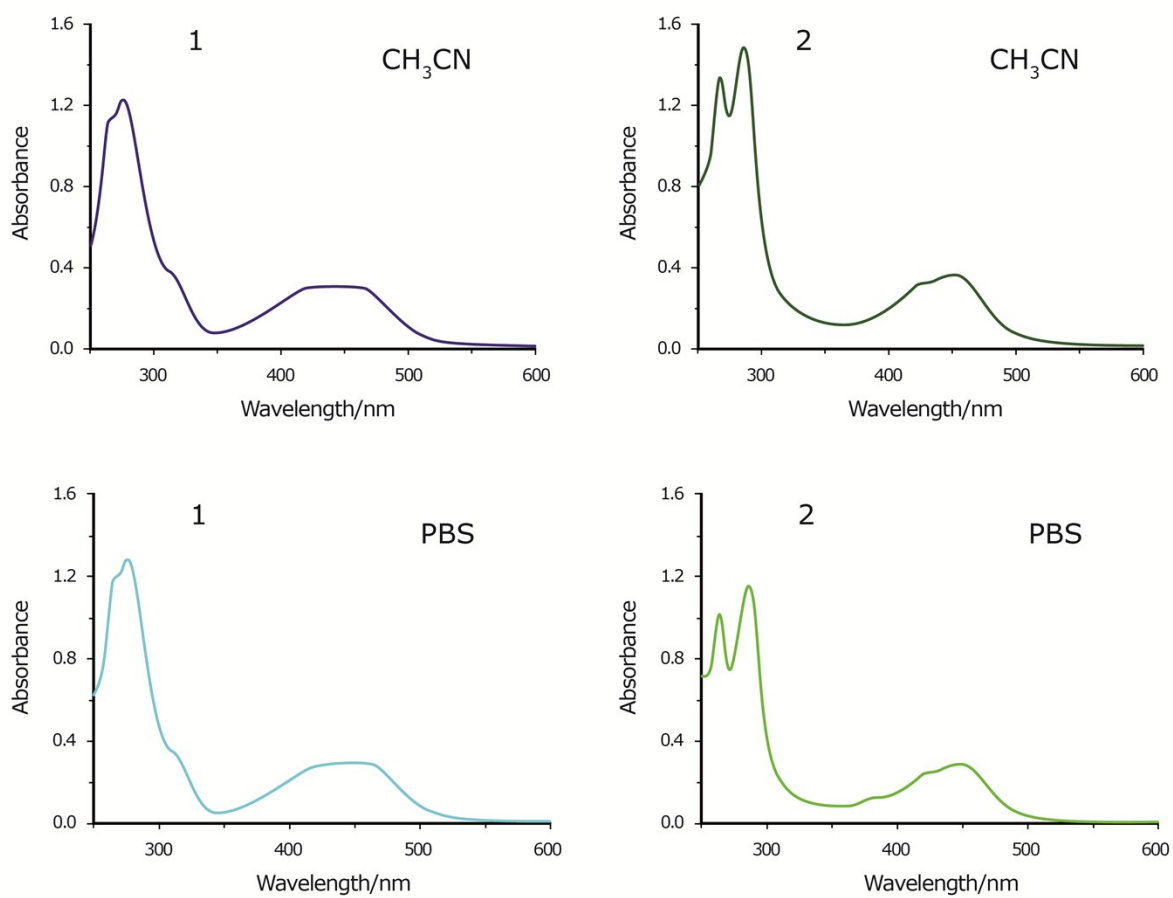

**Fig. S15.** UV/Vis spectra of complexes **1** and **2** in CH<sub>3</sub>CN and PBS at 298 K.



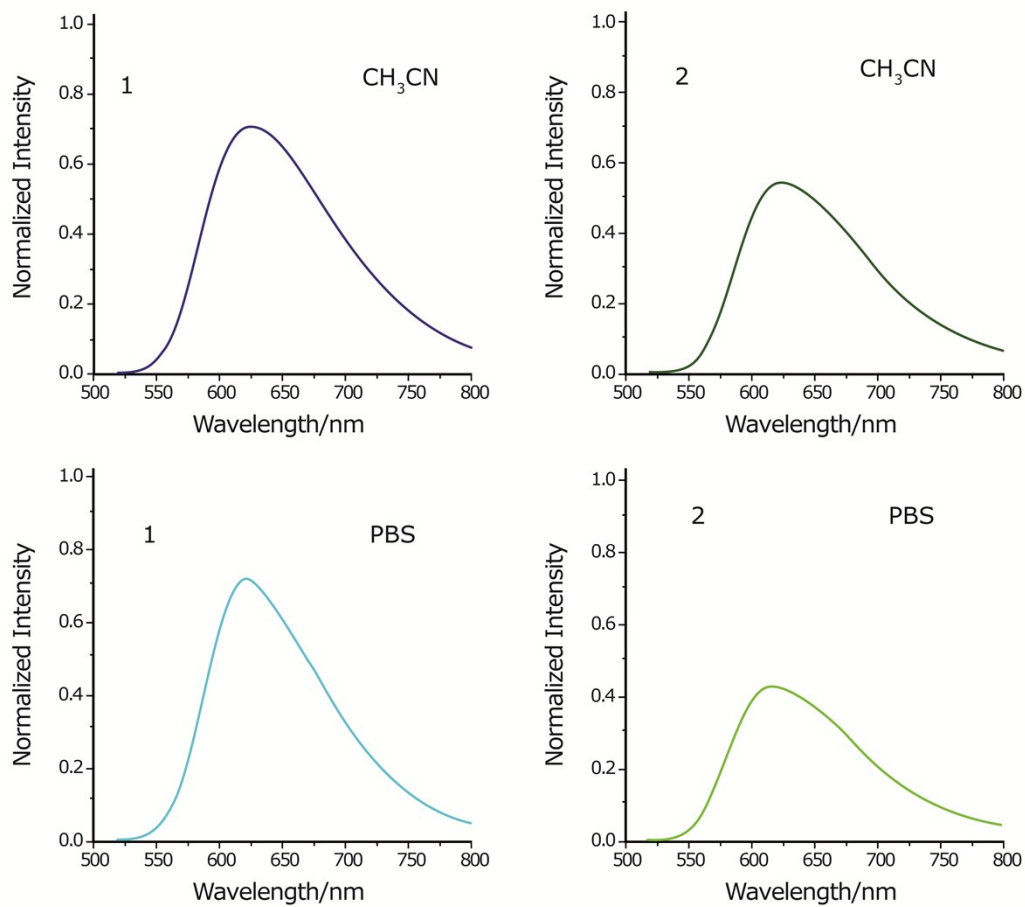

**Fig. S16.** Emission spectra of complexes **1** and **2** in CH<sub>3</sub>CN and PBS at 298 K.

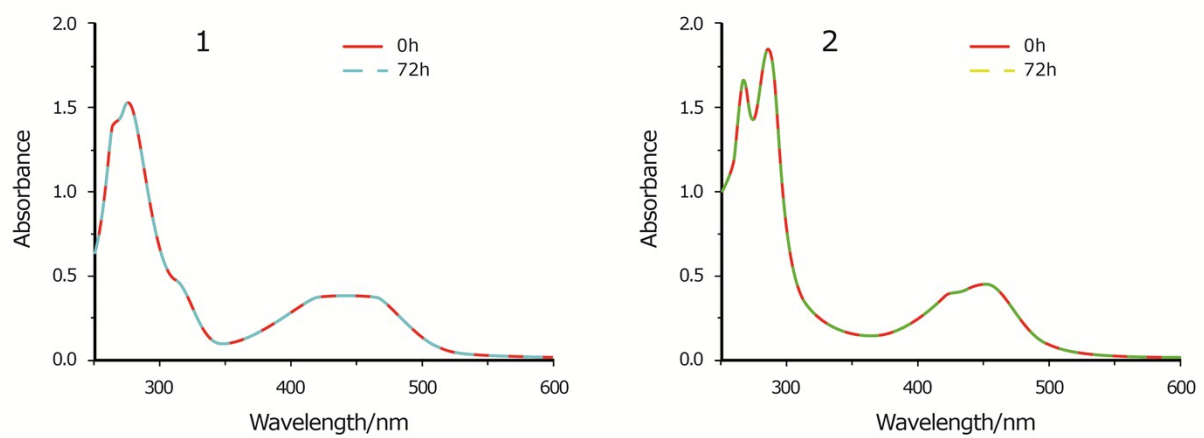

**Fig. S17.** Photostability of **1** and **2** (10  $\mu$ M) detected by UV-Vis spectra in Tris-HCl buffer (5 mM Tris, 50 mM NaCl, pH = 7.4).

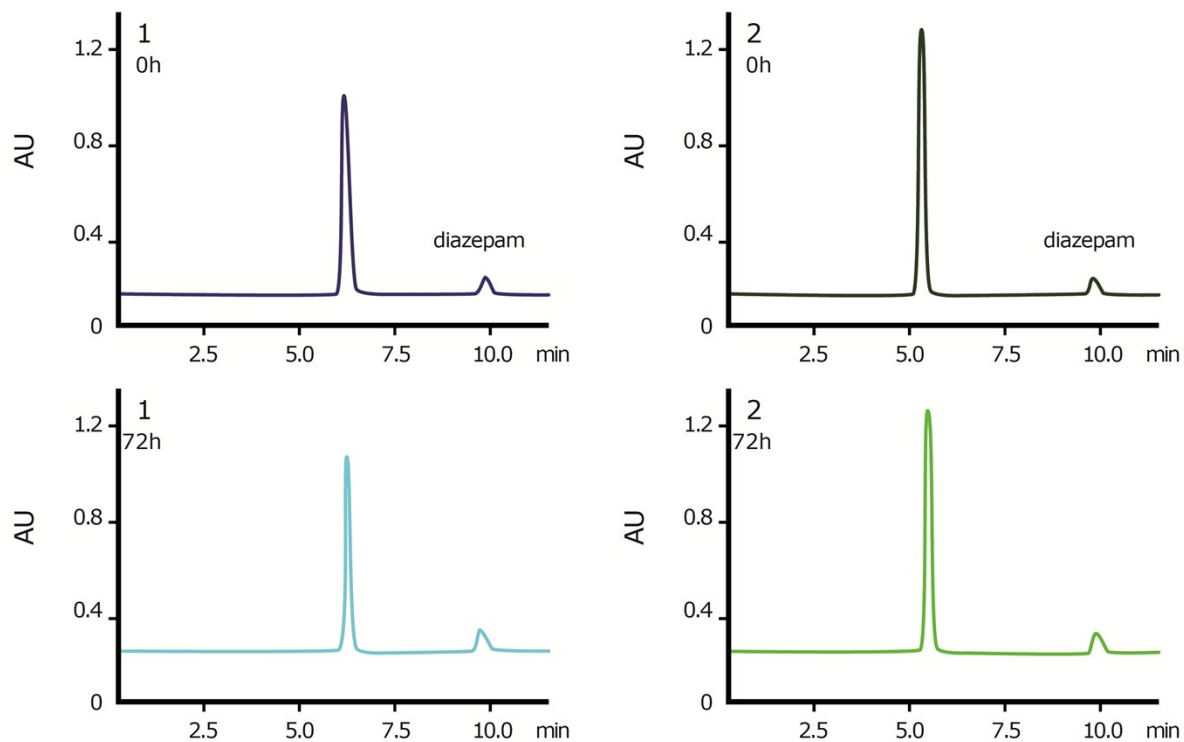

**Fig. S18.** LC-UV traces of plasma incubated with complexes **1** and **2** (20  $\mu$ M, 37  $^{\circ}$ C) at  $t = 0$  and 72 h. (Diazepam was used as internal standard).

**Table S1.** Photophysical data of complexes **1** and **2**.

| Complex  | UV/Vis $\lambda$ [nm] | Emission <sup>[a]</sup> $\lambda$ [nm] | $(\Phi_{em})$ <sup>[b]</sup> | Lifetimes [ns] <sup>[c]</sup> |
|----------|-----------------------|----------------------------------------|------------------------------|-------------------------------|
| <b>1</b> | ACN: 265 sh, 279, 435 | ACN: 623                               | 0.93                         | 910                           |
|          | PBS: 269 sh, 282, 450 | PBS: 626                               |                              |                               |
| <b>2</b> | ACN: 262, 283, 449    | ACN: 612                               | 1.05                         | 985                           |
|          | PBS: 265, 286, 453    | PBS: 624                               |                              |                               |

[a] Emission spectra recorded in ACN (acetonitrile).

[b]  $\Phi_{em}$  refers to the luminescence quantum yield and were calculated according to literature procedures.<sup>1</sup>

[c] Lifetimes evaluated ACN (acetonitrile).

**Table S2.** Singlet oxygen quantum yields upon irradiation at 450 nm.

|                | <b>1</b> | <b>2</b> |
|----------------|----------|----------|
| PBS (indirect) | 3%       | 5%       |
| ACN (direct)   | 85%      | 97%      |
| ACN (indirect) | 73%      | 92%      |

**Table S3.** Ratio of peak areas of complex/diazepam

|          | <b>1</b> | <b>2</b> |
|----------|----------|----------|
| t = 0 h  | 9.22     | 8.98     |
| t = 72 h | 9.18     | 8.92     |

## References

1. G. A. Crosby and J. N. Demas, *J. Phys. Chem.*, 1971, **75**, 991-1024.
